# Supplementary material for: Phylogeography and karyotypic evolution of some Deuterodon species from southeastern Brazil (Characiformes, Characidae, Stethaprioninae)
Source: PubMed Central journal article supplement (PMC10337518; doi:10.1590/1678-4685-gmb-2023-0044), 2023-07-10
Supplement: 1415-4757-GMB-46-3-e20230044-s1.pdf [file 1415-4757-GMB-46-3-e20230044-s1.pdf]

**Supplementary Material to “Phylogeography and karyotypic evolution of some  
*Deuterodon* species from southeastern Brazil (Characiformes, Characidae,  
Stethaprioninae)”**

Table S1 - Data access.

| Species                    | Locality                                     | ID   | Accession number |
|----------------------------|----------------------------------------------|------|------------------|
| <i>Deuterodon hastatus</i> | Ariró river / Angra dos Reis (RJ)            | ang1 | MH158929.1       |
| <i>D. hastatus</i>         | Ariró river / Angra dos Reis (RJ)            | ang2 | MH158930.1       |
| <i>D. hastatus</i>         | Ariró river / Angra dos Reis (RJ)            | ang3 | MH158931.1       |
| <i>D. hastatus</i>         | Ariró river / Angra dos Reis (RJ)            | ang4 | MH158932.1       |
| <i>D. hastatus</i>         | Ariró river / Angra dos Reis (RJ)            | ang5 | MH158933.1       |
| <i>D. hastatus</i>         | Ariró river / Angra dos Reis (RJ)            | ang6 | MH158934.1       |
| <i>D. hastatus</i>         | Guapimirim river / Santana de Japuiba (RJ)   | pf1  | MH158935.1       |
| <i>D. hastatus</i>         | Guapimirim river / Santana de Japuiba (RJ)   | pf2  | MH158936.2       |
| <i>D. hastatus</i>         | Guapimirim river / Santana de Japuiba (RJ)   | pf3  | MH158937.3       |
| <i>D. hastatus</i>         | Guapimirim river / Santana de Japuiba (RJ)   | pf4  | MH158938.4       |
| <i>D. hastatus</i>         | Guapimirim river / Santana de Japuiba (RJ)   | pf5  | MH158939.5       |
| <i>D. hastatus</i>         | Guapimirim river / Cachoeiras de Macacu (RJ) | pr1  | MH158940.1       |
| <i>D. hastatus</i>         | Guapimirim river / Cachoeiras de Macacu (RJ) | pr2  | MH158941.2       |
| <i>D. hastatus</i>         | Guapimirim river / Cachoeiras de Macacu (RJ) | pr3  | MH158942.3       |
| <i>D. hastatus</i>         | Guapimirim river / Cachoeiras de Macacu (RJ) | pr4  | MH158943.4       |
| <i>D. hastatus</i>         | Guapimirim river / Cachoeiras de Macacu (RJ) | pr5  | MH158944.5       |
| <i>D. hastatus</i>         | Guapimirim river / Macacu river (RJ)         | rm1  | MH158945.1       |
| <i>D. hastatus</i>         | Guapimirim river / Macacu river (RJ)         | rm2  | MH158946.1       |
| <i>D. hastatus</i>         | Guapimirim river / Macacu river (RJ)         | rm3  | MH158947.1       |
| <i>D. hastatus</i>         | Guapimirim river / Macacu river (RJ)         | rm4  | MH158948.1       |
| <i>D. hastatus</i>         | Guapimirim river / Macacu river (RJ)         | rm5  | MH158949.1       |
| <i>D. hastatus</i>         | Guapimirim river / Ypiranga community (RJ)   | yp1  | MH158950.1       |
| <i>D. hastatus</i>         | Guapimirim river / Ypiranga community (RJ)   | yp2  | MH158951.1       |
| <i>D. hastatus</i>         | Guapimirim river / Ypiranga community (RJ)   | yp3  | MH158952.1       |
| <i>Deuterodon ribeirae</i> | Ribeira de Iguape river / Iporanga (SP)      | pg1  | MH158975.1       |
| <i>D. ribeirae</i>         | Ribeira de Iguape river / Iporanga (SP)      | pg2  | MH158976.1       |
| <i>D. ribeirae</i>         | Ribeira de Iguape river / Iporanga (SP)      | pg3  | MH158977.1       |
| <i>D. ribeirae</i>         | Ribeira de Iguape river / Iporanga (SP)      | pg4  | MH158978.1       |
| <i>D. ribeirae</i>         | Ribeira de Iguape river / Registro (SP)      | pp1  | MH158979.1       |
| <i>D. ribeirae</i>         | Ribeira de Iguape river / Registro (SP)      | pp2  | MH158980.1       |

| Species                        | Locality                                | ID     | Accession number |
|--------------------------------|-----------------------------------------|--------|------------------|
| <i>D. ribeirae</i>             | Ribeira de Iguape river / Registro (SP) | pp3    | MH158981.1       |
| <i>Deuterodon giton</i>        | Paraiba do Sul river / Cunha (SP)       | ps1    | -                |
| <i>D. giton</i>                | Paraiba do Sul river / Cunha (SP)       | ps2    | MH158927.1       |
| <i>D. giton</i>                | Paraiba do Sul river / Cunha (SP)       | ps3    | MH158928.1       |
| <i>Deuterodon intermedius</i>  | Paraiba do Sul river / Cunha (SP)       | ps1    | MH158953.1       |
| <i>D. intermedius</i>          | Paraiba do Sul river / Cunha (SP)       | ps2    | MH158954.1       |
| <i>D. intermedius</i>          | Paraiba do Sul river / Cunha (SP)       | ps3    | -                |
| <i>D. giton</i>                | Doce river / Latão Creek (MG)           | rd     | MF805815.1       |
| <i>Astyanax mexicanus</i>      | -                                       | 1      | MH158964.1       |
| <i>A. mexicanus</i>            | -                                       | 3      | MH158966.1       |
| <i>A. mexicanus</i>            | -                                       | 4      | MH158967.1       |
| <i>Astyanax altiparanae</i>    | -                                       | in     | MH158821.1       |
| <i>A. altiparanae</i>          | -                                       | pe     | MH158822.1       |
| <i>A. altiparanae</i>          | -                                       | pnb101 | MH158823.1       |
| <i>Astyanax jacuhiensis</i>    | -                                       | 1      | MH158955.1       |
| <i>A. jacuhiensis</i>          | -                                       | 2      | MH158956.1       |
| <i>Astyanax bimaculatus</i>    | -                                       | ad2    | MH158857.1       |
| <i>A. bimaculatus</i>          | -                                       | ad3    | MH158858.1       |
| <i>Astyanax abramis</i>        | -                                       | cui1   | MH158811.1       |
| <i>A. abramis</i>              | -                                       | cui2   | MH158812.1       |
| <i>A. abramis</i>              | -                                       | cui3   | MH158813.1       |
| <i>Astyanax assuncionensis</i> | -                                       | ja1    | MH158838.1       |
| <i>A. assuncionensis</i>       | -                                       | ja2    | MH158839.1       |
| <i>A. assuncionensis</i>       | -                                       | ja3    | MH158840.1       |
| <i>Astyanax lacustris</i>      | -                                       | ara1   | MH158957.1       |
| <i>A. lacustris</i>            | -                                       | ara2   | MH158958.1       |
| <i>A. lacustris</i>            | -                                       | ara3   | MH158959.1       |
| <i>Psalidodon paranae</i>      | -                                       | od1    | MH158969.1       |
| <i>P. paranae</i>              | -                                       | od2    | MH158970.1       |
| <i>P. paranae</i>              | -                                       | od3    | MH158971.1       |
| <i>Psalidodon rivularis</i>    | -                                       | ab1    | MH158982.1       |
| <i>P. rivularis</i>            | -                                       | ab2    | MH158983.1       |
| <i>P. rivularis</i>            | -                                       | ct1    | MH158987.1       |
| <i>P. rivularis</i>            | -                                       | ct2    | MH158988.1       |
| <i>Psalidodon bifasciatus</i>  | -                                       | cs1    | MH158848.1       |
| <i>P. bifasciatus</i>          | -                                       | cs2    | MH158849.1       |
| <i>P. bifasciatus</i>          | -                                       | cs3    | MH15885.10       |
| <i>Psalidodon fasciatus</i>    | -                                       | rg1    | KY118923.1       |
| <i>P. fasciatus</i>            | -                                       | rg2    | KY118924.1       |
| <i>P. fasciatus</i>            | -                                       | rg3    | KY118925.1       |
| <i>P. fasciatus</i>            | -                                       | sfpa   | KY118938.1       |
| <i>P. fasciatus</i>            | -                                       | sfsc1  | KY118939.1       |
| <i>P. fasciatus</i>            | -                                       | sfsc2  | KY1189.140       |
| <i>Roeboides dayi</i>          | -                                       | 1      | AF040526.1       |
| <i>R. dayi</i>                 | -                                       | 2      | AF04052.17       |
| <i>Roeboides magdalenae</i>    | -                                       | -      | AF040525.1       |

| <b>Species</b>                    | <b>Locality</b> | <b>ID</b> | <b>Accession number</b> |
|-----------------------------------|-----------------|-----------|-------------------------|
| <i>Roeboides meeki</i>            | -               | 1         | AF040522.1              |
| <i>R. meeki</i>                   | -               | 2         | AF040523.1              |
| <i>R. meeki</i>                   | -               | 3         | AF040524.1              |
| <i>Roeboides occidentalis</i>     | -               | 1         | AF040498.1              |
| <i>R. occidentalis</i>            | -               | 2         | AF040499.1              |
| <i>R. occidentalis</i>            | -               | 3         | AF040450.1              |
| <i>Roeboides guatemalensis</i>    | -               | 1         | AF040490.1              |
| <i>R. guatemalensis</i>           | -               | 2         | AF040491.1              |
| <i>R. guatemalensis</i>           | -               | 3         | AF040492.1              |
| <i>Eretmobrycon bayano</i>        | -               | 1         | AF412573.1              |
| <i>E. bayano</i>                  | -               | 2         | AF412574.1              |
| <i>E. bayano</i>                  | -               | 3         | AF412575.1              |
| <i>E. bayano</i>                  | -               | 4         | AF412576.1              |
| <i>E. bayano</i>                  | -               | 5         | AF412577.1              |
| <i>Bryconamericus terrabensis</i> | -               | 1         | AF412587.1              |
| <i>B. terrabensis</i>             | -               | 2         | AF412588.1              |
| <i>B. terrabensis</i>             | -               | 3         | AF412589.1              |
| <i>B. terrabensis</i>             | -               | 4         | AF412590.1              |
| <i>Bryconamericus scopiferus</i>  | -               | 1         | AF412627.1              |
| <i>B. scopiferus</i>              | -               | 2         | AF412626.1              |
| <i>B. scopiferus</i>              | -               | 3         | AF412625.1              |
| <i>B. scopiferus</i>              | -               | 4         | AF412624.1              |
| <i>Bryconamericus emperador</i>   | -               | 1         | AF412591.1              |
| <i>B. emperador</i>               | -               | 2         | AF412592.1              |
| <i>B. emperador</i>               | -               | 3         | AF412593.1              |
| <i>B. emperador</i>               | -               | 4         | AF412612.1              |
| <i>B. emperador</i>               | -               | 5         | AF412613.1              |
| <i>B. emperador</i>               | -               | 6         | AF412614.1              |
| <i>Triportheus albus</i>          | -               | -         | MF188225.1              |
| <i>Triportheus auritus</i>        | -               | -         | MF188228.1              |
| <i>Triportheus culter</i>         | -               | -         | MF188229.1              |
| <i>Triportheus brachipomus</i>    | -               | -         | MF188231.1              |
